# Supplementary material for: Expression of embryonal stem cell transcription factors in breast cancer: Oct4 as an indicator for poor clinical outcome and tamoxifen resistance
Source: PubMed Central journal article supplement (PMC5482656; doi:10.18632/oncotarget.16750), 2017-03-31
Supplement: oncotarget-08-36305-s001.pdf [file oncotarget-08-36305-s001.pdf]

## Expression of embryonal stem cell transcription factors in breast cancer: Oct4 as an indicator for poor clinical outcome and tamoxifen resistance

### Supplementary Materials

**Supplementary Table 1: Relationship between clinicopathologic characteristics of tumor and expression of Nanog, Bmi1, and Klf4 assessed by immunohistochemistry**

| Clinicopathologic Characteristics | Nanog                    |                          | <i>p</i> value | Bmi1                     |                          | <i>p</i> value | Klf4                     |                          | <i>p</i> value |
|-----------------------------------|--------------------------|--------------------------|----------------|--------------------------|--------------------------|----------------|--------------------------|--------------------------|----------------|
|                                   | Negative<br><i>N</i> (%) | Positive<br><i>N</i> (%) |                | Negative<br><i>N</i> (%) | Positive<br><i>N</i> (%) |                | Negative<br><i>N</i> (%) | Positive<br><i>N</i> (%) |                |
| T stage                           |                          |                          | 0.538          |                          |                          | 0.698          |                          |                          | 0.635          |
| T1                                | 132 (52.0)               | 31 (47.7)                |                | 79 (50.0)                | 84 (52.2)                |                | 136 (51.7)               | 27 (48.2)                |                |
| T2-T4                             | 122 (48.0)               | 34 (52.3)                |                | 79 (50.0)                | 77 (47.8)                |                | 127 (48.3)               | 29 (51.8)                |                |
| N stage                           |                          |                          | 0.009          |                          |                          | 0.447          |                          |                          | 0.527          |
| N0                                | 155 (61.0)               | 28 (43.1)                |                | 94 (59.5)                | 89 (55.3)                |                | 153 (58.2)               | 30 (53.6)                |                |
| N1-N3                             | 99 (39.0)                | 37 (56.9)                |                | 64 (40.5)                | 72 (44.7)                |                | 110 (41.8)               | 26 (46.4)                |                |
| Histologic grade                  |                          |                          | 0.015          |                          |                          | 0.002          |                          |                          | 0.022          |
| I                                 | 35 (13.8)                | 10 (15.4)                |                | 14 (8.9)                 | 31 (19.3)                |                | 38 (14.4)                | 7 (12.5)                 |                |
| II                                | 66 (26.0)                | 28 (43.1)                |                | 40 (25.3)                | 54 (33.5)                |                | 69 (26.2)                | 25 (44.6)                |                |
| III                               | 153 (60.2)               | 27 (41.5)                |                | 104 (65.8)               | 76 (47.2)                |                | 156 (59.3)               | 24 (42.9)                |                |
| LVI                               |                          |                          | 0.530          |                          |                          | 0.156          |                          |                          | 0.852          |
| Absent                            | 140 (55.1)               | 33 (50.8)                |                | 92 (58.2)                | 81 (50.3)                |                | 142 (54.0)               | 31 (55.4)                |                |
| Present                           | 114 (44.9)               | 32 (49.2)                |                | 66 (41.8)                | 80 (49.7)                |                | 121 (46.0)               | 25 (44.6)                |                |
| P53 overexpression                |                          |                          | 0.072          |                          |                          | 0.040          |                          |                          | 0.048          |
| Negative                          | 170 (66.9)               | 51 (78.5)                |                | 101 (63.9)               | 120 (74.5)               |                | 176 (66.9)               | 45 (80.4)                |                |
| Positive                          | 84 (33.1)                | 14 (21.5)                |                | 57 (36.1)                | 41 (25.5)                |                | 87 (33.1)                | 11 (19.6)                |                |
| Ki-67 index                       |                          |                          | 0.166          |                          |                          | 0.001          |                          |                          | 0.168          |
| < 20%                             | 128 (50.4)               | 39 (60.0)                |                | 68 (43.0)                | 99 (61.5)                |                | 133 (50.6)               | 34 (60.7)                |                |
| ≥ 20%                             | 126 (49.6)               | 26 (40.0)                |                | 90 (57.0)                | 62 (38.5)                |                | 130 (49.4)               | 22 (39.3)                |                |
| ER                                |                          |                          | 0.007          |                          |                          | <0.001         |                          |                          | 0.009          |
| Negative                          | 87 (34.3)                | 11 (16.9)                |                | 70 (44.3)                | 28 (17.4)                |                | 89 (33.8)                | 9 (16.1)                 |                |
| Positive                          | 167 (65.7)               | 54 (83.1)                |                | 88 (55.7)                | 133 (82.6)               |                | 174 (66.2)               | 47 (83.9)                |                |
| PR                                |                          |                          | 0.017          |                          |                          | 0.003          |                          |                          | 0.028          |
| Negative                          | 124 (48.8)               | 21 (32.3)                |                | 85 (53.8)                | 60 (37.3)                |                | 127 (48.3)               | 18 (32.1)                |                |
| Positive                          | 130 (51.2)               | 44 (67.7)                |                | 73 (46.2)                | 101 (62.7)               |                | 136 (51.7)               | 38 (67.9)                |                |
| HER2                              |                          |                          | 0.038          |                          |                          | 0.077          |                          |                          | 0.680          |
| Negative                          | 183 (72.0)               | 55 (84.6)                |                | 111 (70.3)               | 127 (78.9)               |                | 195 (74.1)               | 43 (76.8)                |                |
| Positive                          | 71 (28.0)                | 10 (15.4)                |                | 47 (29.7)                | 34 (21.1)                |                | 68 (25.9)                | 13 (23.2)                |                |

*P* values were calculated by chi-square test or Fisher's exact test.

LVI, lymphovascular invasion; ER, estrogen receptor; PR, progesterone receptor; HER2, human epidermal growth factor receptor 2.

**Supplementary Table 2: Expression of Nanog, Bmi1, and Klf4 in relation to BCSC phenotypes and EMT markers**

| Markers          | Nanog                    |                          | <i>p</i> value | Bmi1                     |                          | <i>p</i> value | Klf4                     |                          | <i>p</i> value |
|------------------|--------------------------|--------------------------|----------------|--------------------------|--------------------------|----------------|--------------------------|--------------------------|----------------|
|                  | Negative<br><i>N</i> (%) | Positive<br><i>N</i> (%) |                | Negative<br><i>N</i> (%) | Positive<br><i>N</i> (%) |                | Negative<br><i>N</i> (%) | Positive<br><i>N</i> (%) |                |
| CD44(+)CD24(-)   |                          |                          | 0.086          |                          |                          | 0.344          |                          |                          | 0.584          |
| < 10%            | 126 (49.6)               | 40 (61.5)                |                | 78 (49.4)                | 88 (54.7)                |                | 135 (51.3)               | 31 (55.4)                |                |
| ≥ 10%            | 128 (50.4)               | 25 (38.5)                |                | 80 (50.6)                | 73 (45.3)                |                | 128 (48.7)               | 25 (44.6)                |                |
| ALDH1            |                          |                          | 0.050          |                          |                          | 0.049          |                          |                          | 0.008          |
| < 10%            | 226 (89.0)               | 63 (96.9)                |                | 138 (87.3)               | 151 (93.8)               |                | 233 (88.6)               | 56 (100.0)               |                |
| ≥ 10%            | 28 (11.0)                | 2 (3.1)                  |                | 20 (12.7)                | 10 (6.2)                 |                | 30 (11.4)                | 0 (0.0)                  |                |
| Vimentin         |                          |                          | 0.010          |                          |                          | 0.136          |                          |                          | 0.350          |
| < 10%            | 210 (82.7)               | 62 (95.4)                |                | 130 (82.3)               | 142 (88.2)               |                | 222 (84.4)               | 50 (89.3)                |                |
| ≥ 10%            | 44 (17.3)                | 3 (4.6)                  |                | 28 (17.7)                | 19 (11.8)                |                | 41 (15.6)                | 6 (10.7)                 |                |
| E-cadherin loss* |                          |                          | 0.002          |                          |                          | 0.079          |                          |                          | 0.005          |
| < 50%            | 169 (67.9)               | 57 (87.7)                |                | 106 (67.5)               | 120 (76.4)               |                | 178 (68.7)               | 48 (87.3)                |                |
| ≥ 50%            | 80 (32.1)                | 8 (12.3)                 |                | 51 (32.5)                | 37 (23.6)                |                | 81 (31.3)                | 7 (12.7)                 |                |

*P* values were calculated by chi-square test or Fisher's exact test.

ALDH1, aldehyde dehydrogenase 1

\* Invasive lobular carcinoma cases were excluded.

**Supplementary Table 3: Relationship between clinicopathologic characteristics of tumor and expression of Nanog, Bmi1, and Klf4 in the hormone receptor-positive subgroup**

| Clinicopathologic Characteristics | Nanog                    |                          | <i>p</i> value | Bmi1                     |                          | <i>p</i> value | Klf4                     |                          | <i>p</i> value |
|-----------------------------------|--------------------------|--------------------------|----------------|--------------------------|--------------------------|----------------|--------------------------|--------------------------|----------------|
|                                   | Negative<br><i>N</i> (%) | Positive<br><i>N</i> (%) |                | Negative<br><i>N</i> (%) | Positive<br><i>N</i> (%) |                | Negative<br><i>N</i> (%) | Positive<br><i>N</i> (%) |                |
| T stage                           |                          |                          | 0.464          |                          |                          | 0.408          |                          |                          | 0.598          |
| T1                                | 92 (54.8)                | 27 (49.1)                |                | 45 (50.0)                | 74 (55.6)                |                | 95 (54.3)                | 24 (50.0)                |                |
| T2-T4                             | 76 (45.2)                | 28 (50.9)                |                | 45 (50.0)                | 59 (44.4)                |                | 80 (45.7)                | 24 (50.0)                |                |
| N stage                           |                          |                          | 0.006          |                          |                          | 0.386          |                          |                          | 0.504          |
| N0                                | 100 (59.5)               | 21 (38.2)                |                | 52 (57.8)                | 69 (51.9)                |                | 97 (55.4)                | 24 (50.0)                |                |
| N1-N3                             | 68 (40.5)                | 34 (61.8)                |                | 38 (42.2)                | 64 (48.1)                |                | 78 (44.6)                | 24 (50.0)                |                |
| Histologic grade                  |                          |                          | 0.166          |                          |                          | 0.325          |                          |                          | 0.093          |
| I                                 | 34 (20.2)                | 10 (18.2)                |                | 14 (15.6)                | 30 (22.6)                |                | 37 (21.1)                | 7 (14.6)                 |                |
| II                                | 59 (35.1)                | 27 (49.1)                |                | 34 (37.8)                | 52 (39.1)                |                | 61 (34.9)                | 25 (52.1)                |                |
| III                               | 75 (44.6)                | 18 (32.7)                |                | 42 (46.7)                | 51 (38.3)                |                | 77 (44.0)                | 16 (33.3)                |                |
| LVI                               |                          |                          | 0.463          |                          |                          | 0.210          |                          |                          | 0.936          |
| Absent                            | 89 (53.0)                | 26 (47.3)                |                | 51 (56.7)                | 64 (48.1)                |                | 90 (51.4)                | 25 (52.1)                |                |
| Present                           | 79 (47.0)                | 29 (52.7)                |                | 39 (43.3)                | 69 (51.9)                |                | 85 (48.6)                | 23 (47.9)                |                |
| P53 overexpression                |                          |                          | 0.606          |                          |                          | 0.849          |                          |                          | 0.116          |
| Negative                          | 132 (78.6)               | 45 (81.8)                |                | 72 (80.0)                | 105 (78.9)               |                | 135 (77.1)               | 42 (87.5)                |                |
| Positive                          | 36 (21.4)                | 10 (18.2)                |                | 18 (20.0)                | 28 (21.1)                |                | 40 (22.9)                | 6 (12.5)                 |                |
| Ki-67                             |                          |                          | 0.795          |                          |                          | 0.645          |                          |                          | 0.898          |
| < 20%                             | 116 (69.0)               | 39 (70.9)                |                | 61 (67.8)                | 94 (70.7)                |                | 122 (69.7)               | 33 (68.8)                |                |
| ≥ 20%                             | 52 (31.0)                | 16 (29.1)                |                | 29 (32.2)                | 39 (29.3)                |                | 53 (30.3)                | 15 (31.3)                |                |
| HER2                              |                          |                          | 0.212          |                          |                          | 0.609          |                          |                          | 0.941          |
| Negative                          | 134 (79.8)               | 48 (87.3)                |                | 72 (80.0)                | 110 (82.7)               |                | 143 (81.7)               | 39 (81.3)                |                |
| Positive                          | 34 (20.2)                | 7 (12.7)                 |                | 18 (20.0)                | 23 (17.3)                |                | 32 (18.3)                | 9 (18.8)                 |                |
| CD44(+)/CD24(-)                   |                          |                          | 0.768          |                          |                          | 0.883          |                          |                          | 0.737          |
| < 10%                             | 97 (57.7)                | 33 (60.0)                |                | 53 (58.9)                | 77 (57.9)                |                | 101 (57.7)               | 29 (60.4)                |                |
| ≥ 10%                             | 71 (42.3)                | 22 (40.0)                |                | 37 (41.1)                | 56 (42.1)                |                | 74 (42.3)                | 19 (39.6)                |                |
| ALDH1                             |                          |                          | 0.198          |                          |                          | 0.444          |                          |                          | 0.351          |
| < 10%                             | 161 (95.8)               | 55 (100.0)               |                | 86 (95.6)                | 130 (97.7)               |                | 168 (96.0)               | 48 (100.0)               |                |
| ≥ 10%                             | 7 (4.2)                  | 0 (0.0)                  |                | 4 (4.4)                  | 3 (2.3)                  |                | 7 (4.0)                  | 0 (0.0)                  |                |
| Vimentin                          |                          |                          | 0.194          |                          |                          | 0.307          |                          |                          | 0.739          |
| < 10%                             | 156 (92.9)               | 54 (98.2)                |                | 83 (92.2)                | 127 (95.5)               |                | 164 (93.7)               | 46 (95.8)                |                |
| ≥ 10%                             | 12 (7.1)                 | 1 (1.8)                  |                | 7 (7.8)                  | 6 (4.5)                  |                | 11 (6.3)                 | 2 (4.2)                  |                |
| E-cadherin loss*                  |                          |                          | 0.012          |                          |                          | 0.453          |                          |                          | 0.047          |
| < 50%                             | 122 (74.8)               | 50 (90.9)                |                | 68 (76.4)                | 104 (80.6)               |                | 130 (76.0)               | 42 (89.4)                |                |
| ≥ 50%                             | 41 (25.2)                | 5 (9.1)                  |                | 21 (23.6)                | 25 (19.4)                |                | 41 (24.0)                | 5 (10.6)                 |                |

*P* values were calculated by chi-square test or Fisher's exact test.

\*Invasive lobular carcinoma cases were excluded.

LVI, lymphovascular invasion; HER2, human epidermal growth factor receptor 2; ALDH1, aldehyde dehydrogenase 1.

**Supplementary Table 4: Relationship between clinicopathologic characteristics of tumor and expression of Nanog, Bmi1, and Klf4 in the hormone receptor-negative subgroup**

| Clinicopathologic Characteristics | Nanog             |                   |                | Bmi1              |                   |                | Klf4              |                   |                |
|-----------------------------------|-------------------|-------------------|----------------|-------------------|-------------------|----------------|-------------------|-------------------|----------------|
|                                   | Negative<br>N (%) | Positive<br>N (%) | <i>p</i> value | Negative<br>N (%) | Positive<br>N (%) | <i>p</i> value | Negative<br>N (%) | Positive<br>N (%) | <i>p</i> value |
| T stage                           |                   |                   | 0.750          |                   |                   | 0.202          |                   |                   | 0.723          |
| T1                                | 40 (46.5)         | 4 (40.0)          |                | 34 (50.0)         | 10 (35.7)         |                | 41 (46.6)         | 3 (37.5)          |                |
| T2-T4                             | 46 (53.5)         | 6 (60.0)          |                | 34 (50.0)         | 18 (64.3)         |                | 47 (53.4)         | 5 (62.5)          |                |
| N stage                           |                   |                   | 1.000          |                   |                   | 0.368          |                   |                   | 0.708          |
| N0                                | 55 (64.0)         | 7 (70.0)          |                | 42 (61.8)         | 20 (71.4)         |                | 56 (63.6)         | 6 (75.0)          |                |
| N1-N3                             | 31 (36.0)         | 3 (30.0)          |                | 26 (38.2)         | 8 (28.6)          |                | 32 (36.4)         | 2 (25.0)          |                |
| Histologic grade                  |                   |                   | 1.000          |                   |                   | 0.454          |                   |                   | 1.000          |
| I                                 | 1 (1.2)           | 0 (0.0)           |                | 0 (0.0)           | 1 (3.6)           |                | 1 (1.1)           | 0 (0.0)           |                |
| II                                | 7 (8.1)           | 1 (10.0)          |                | 6 (8.8)           | 2 (7.1)           |                | 8 (9.1)           | 0 (0.0)           |                |
| III                               | 78 (90.7)         | 9 (90.0)          |                | 62 (91.2)         | 25 (89.3)         |                | 79 (89.8)         | 8 (100.0)         |                |
| LVI                               |                   |                   | 0.735          |                   |                   | 0.969          |                   |                   | 0.472          |
| Absent                            | 51 (59.3)         | 7 (70.0)          |                | 41 (60.3)         | 17 (60.7)         |                | 52 (59.1)         | 6 (75.0)          |                |
| Present                           | 35 (40.7)         | 3 (30.0)          |                | 27 (39.7)         | 11 (39.3)         |                | 36 (40.9)         | 2 (25.0)          |                |
| P53 overexpression                |                   |                   | 0.505          |                   |                   | 0.329          |                   |                   | 0.723          |
| Negative                          | 38 (44.2)         | 6 (60.0)          |                | 29 (42.6)         | 15 (53.6)         |                | 41 (46.6)         | 3 (37.5)          |                |
| Positive                          | 48 (55.8)         | 4 (40.0)          |                | 39 (57.4)         | 13 (46.4)         |                | 47 (53.4)         | 5 (62.5)          |                |
| Ki-67                             |                   |                   | 0.598          |                   |                   | 0.289          |                   |                   | 1.000          |
| < 20%                             | 11 (12.8)         | 0 (0.0)           |                | 6 (8.8)           | 5 (17.9)          |                | 10 (11.4)         | 1 (12.5)          |                |
| ≥20 %                             | 75 (87.2)         | 10 (100.0)        |                | 62 (91.2)         | 23 (82.1)         |                | 78 (88.6)         | 7 (87.5)          |                |
| HER2                              |                   |                   | 0.514          |                   |                   | 0.761          |                   |                   | 0.715          |
| Negative                          | 49 (57.0)         | 7 (70.0)          |                | 39 (57.4)         | 17 (60.7)         |                | 52 (59.1)         | 4 (50.0)          |                |
| Positive                          | 37 (43.0)         | 3 (30.0)          |                | 29 (42.6)         | 11 (39.3)         |                | 36 (40.9)         | 4 (50.0)          |                |
| CD44(+)CD24(-)                    |                   |                   | 0.037          |                   |                   | 0.817          |                   |                   | 0.706          |
| < 10%                             | 29 (33.7)         | 7 (70.0)          |                | 25 (36.8)         | 11 (39.3)         |                | 34 (38.6)         | 2 (25.0)          |                |
| ≥10 %                             | 57 (66.3)         | 3 (30.0)          |                | 43 (63.2)         | 17 (60.7)         |                | 54 (61.4)         | 6 (75.0)          |                |
| ALDH1                             |                   |                   | 1.000          |                   |                   | 0.878          |                   |                   | 0.192          |
| < 10%                             | 65 (75.6)         | 8 (80.0)          |                | 52 (76.5)         | 21 (75.0)         |                | 65 (73.9)         | 8 (100.0)         |                |
| ≥10 %                             | 21 (24.4)         | 2 (20.0)          |                | 16 (23.5)         | 7 (25.0)          |                | 23 (26.1)         | 0 (0.0)           |                |
| Vimentin                          |                   |                   | 0.486          |                   |                   | 0.148          |                   |                   | 0.448          |
| < 10%                             | 54 (62.8)         | 8 (80.0)          |                | 47 (69.1)         | 15 (53.6)         |                | 58 (65.9)         | 4 (50.0)          |                |
| ≥10%                              | 32 (37.2)         | 2 (20.0)          |                | 21 (30.9)         | 13 (46.4)         |                | 30 (34.1)         | 4 (50.0)          |                |
| E-cadherin loss                   |                   |                   | 0.505          |                   |                   | 0.910          |                   |                   | 0.459          |
| < 50%                             | 47 (54.7)         | 7 (70.0)          |                | 38 (55.9)         | 16 (57.1)         |                | 48 (54.5)         | 6 (75.0)          |                |
| ≥ 50 %                            | 39 (45.3)         | 3 (30.0)          |                | 30 (44.1)         | 12 (42.9)         |                | 40 (45.5)         | 2 (25.0)          |                |

*P* values were calculated by chi-square test or Fisher's exact test.

LVI, lymphovascular invasion; HER2, human epidermal growth factor receptor 2; ALDH1, aldehyde dehydrogenase 1.

**Supplementary Table 5: Kaplan-Meier survival analysis for disease-free survival**

| Group             | Variable                          | <i>p</i> value |
|-------------------|-----------------------------------|----------------|
| Whole study group | T stage (T1 vs. T2–4)             | 0.139          |
|                   | N stage (N0 vs. N1–3)             | 0.017          |
|                   | Histologic grade (I vs. II & III) | 0.075          |
|                   | LVI                               | 0.009          |
|                   | P53 overexpression                | 0.153          |
|                   | Ki-67 index (< 20% vs. ≥ 20%)     | 0.600          |
|                   | ER                                | 0.753          |
|                   | PR                                | 0.538          |
|                   | HER2 amplification                | 0.191          |
|                   | CD44(+)/CD24(–)                   | 0.348          |
|                   | ALDH1                             | 0.272          |
|                   | Vimentin                          | 0.593          |
|                   | E-cadherin loss                   | 0.150          |
|                   | Oct4                              | 0.017          |
|                   | Sox2                              | 0.165          |
|                   | Nanog                             | 0.730          |
|                   | Bmi1                              | 0.495          |
|                   | Klf4                              | 0.243          |
|                   | Adjuvant chemotherapy             | 0.266          |
|                   | Adjuvant radiotherapy             | 0.829          |
|                   | Adjuvant hormone therapy          | 0.625          |
| HR-positive group | T stage (T1 vs. T2–4)             | 0.036          |
|                   | N stage (N0 vs. N1–3)             | 0.007          |
|                   | Histologic grade (I vs. II & III) | 0.060          |
|                   | LVI                               | 0.087          |
|                   | P53 overexpression                | 0.567          |
|                   | Ki-67 index (< 20% vs. ≥ 20%)     | 0.706          |
|                   | HER2 amplification                | 0.328          |
|                   | CD44(+)/CD24(–)                   | 0.109          |
|                   | ALDH1                             | 0.395          |
|                   | Vimentin                          | 0.961          |
|                   | E-cadherin loss                   | 0.190          |
|                   | Oct4                              | <0.001         |
|                   | Sox2                              | 0.384          |
|                   | Nanog                             | 0.416          |
|                   | Bmi1                              | 0.143          |
|                   | Klf4                              | 0.356          |
|                   | Adjuvant chemotherapy             | 0.378          |
|                   | Adjuvant radiotherapy             | 0.846          |
|                   | Adjuvant hormone therapy          | 0.757          |

*P* values were calculated by log-rank test.

LVI, lymphovascular invasion; ER, estrogen receptor; PR, progesterone receptor; HER2, human epidermal growth factor receptor 2; ALDH1, aldehyde dehydrogenase 1; HR, hormone receptor.

**Supplementary Table 6: Antibodies and staining conditions**

| <b>Marker</b> | <b>Host</b>       | <b>Clone</b> | <b>Dilution</b> | <b>Localization</b>  | <b>Company</b>       |
|---------------|-------------------|--------------|-----------------|----------------------|----------------------|
| Oct4          | Rabbit polyclonal | –            | 1:50            | Nucleus              | Abcam                |
| Sox2          | Rabbit monoclonal | SP76         | Ready to use    | Nucleus              | Ventana              |
| Nanog         | Rabbit polyclonal | –            | 1:50            | Nucleus              | Abcam                |
| Bmi1          | Rabbit monoclonal | EPR3745(2)   | 1:50            | Nucleus              | Abcam,               |
| Klf4          | Mouse monoclonal  | 1E6          | 1:50            | Nucleus              | LifeSpan BioSciences |
| CD44          | Mouse monoclonal  | 156-3C11     | 1:1000          | Membrane             | Abcam                |
| CD24          | Mouse monoclonal  | SN3b         | 1:100           | Membrane & cytoplasm | Thermo Scientific    |
| ALDH1         | Mouse monoclonal  | 44/ALDH      | 1:100           | Cytoplasm            | BD Bioscience        |
| Vimentin      | Mouse monoclonal  | V9           | 1:1200          | Cytoplasm            | DAKO                 |
| E-cadherin    | Mouse monoclonal  | NCH-38       | 1:100           | Membrane             | DAKO                 |

ALDH1, aldehyde dehydrogenase 1.
